# Supplementary material for: Comparison between Gradual Reduced Nicotine Content and Usual Nicotine Content Groups on Subjective Cigarette Ratings in a Randomized Double-Blind Trial
Source: Int J Environ Res Public Health. 2020 Sep 26;17(19):7047. doi: 10.3390/ijerph17197047 (PMC7579069; doi:10.3390/ijerph17197047)
Supplement: Supplementary file 1 [file ijerph-17-07047-s001.pdf]

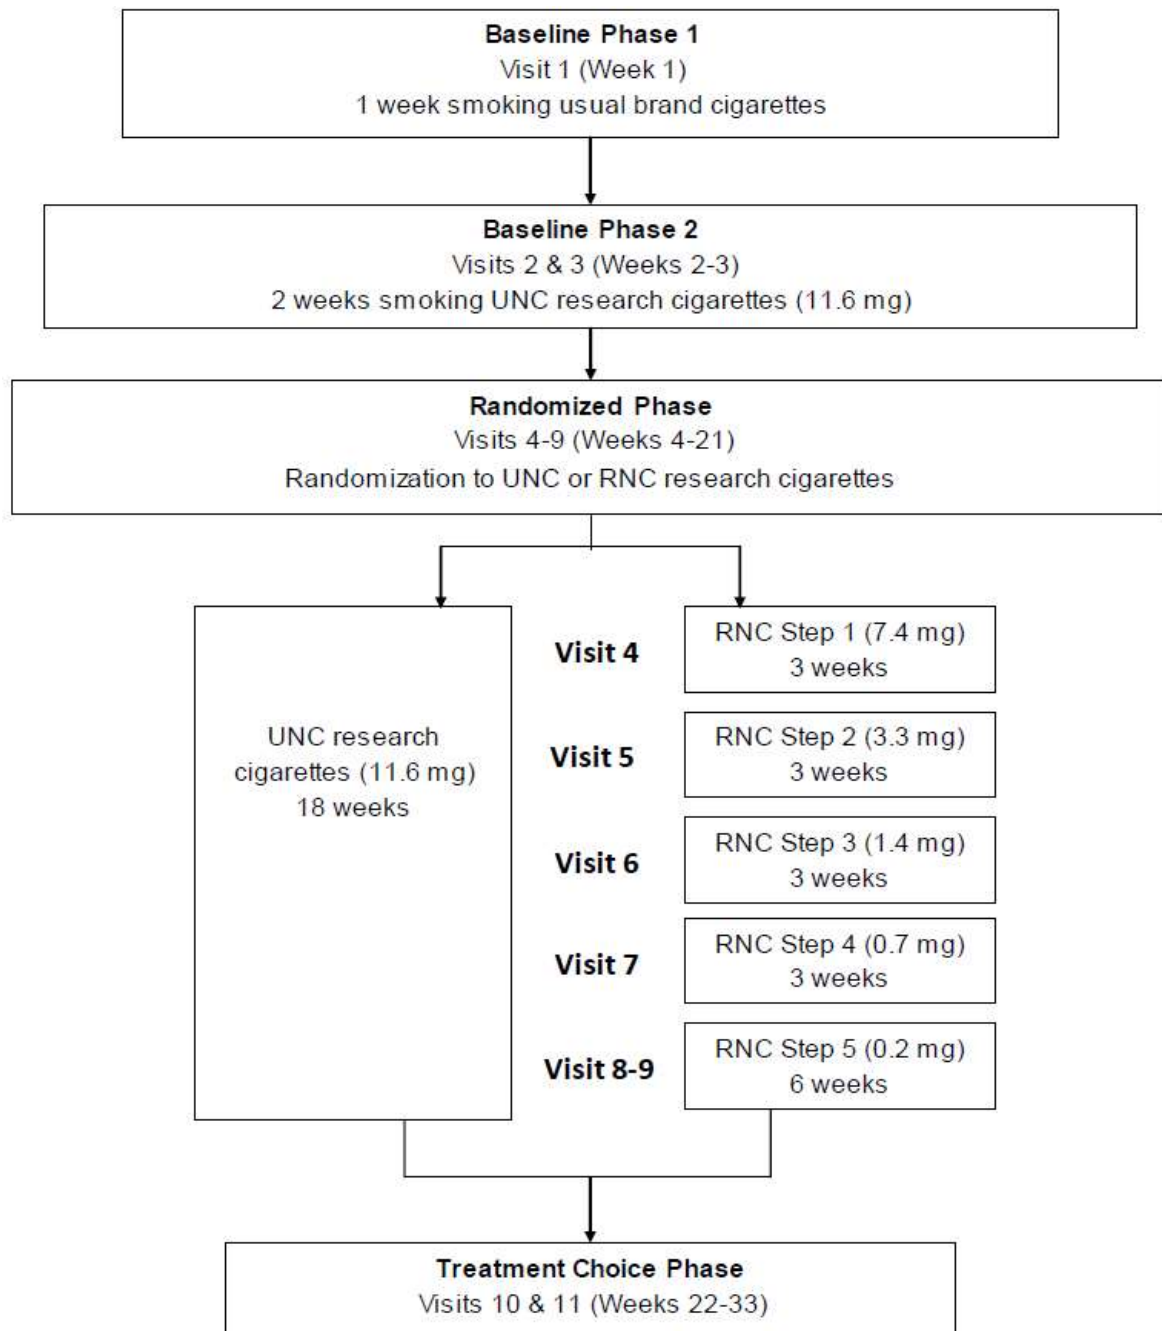

**Figure S1.** Study flow diagram.

**Table S1.** Demographic and smoking characteristics of randomized participants.

|                                                            | Overall<br>(N=245) | Usual Nicotine<br>Content Group<br>(N=123) | Reduced Nicotine<br>Content Group<br>(N=122) |
|------------------------------------------------------------|--------------------|--------------------------------------------|----------------------------------------------|
| <b>Baseline 1 Phase (Usual Brand Cigarettes)</b>           |                    |                                            |                                              |
| <sup>a</sup> Age (years)                                   | 44.9 (11.4)        | 45.1 (10.8)                                | 44.7 (12.1)                                  |
| <sup>a</sup> Gender (male)                                 | 117 (47.8)         | 51 (41.5)                                  | 66 (54.1)                                    |
| <sup>a</sup> Race (n=243)                                  |                    |                                            |                                              |
| White                                                      | 153 (62.4)         | 82 (67.2)                                  | 71 (58.7)                                    |
| Black                                                      | 78 (31.8)          | 35 (28.7)                                  | 43 (35.5)                                    |
| Other                                                      | 12 (4.8)           | 5 (4.1)                                    | 7 (5.7)                                      |
| <sup>a</sup> Hispanic ethnicity                            | 6 (2.4)            | 2 (1.6)                                    | 4 (3.3)                                      |
| BMI <sup>b</sup> (kg/m <sup>2</sup> )                      | 30.3 (8.3)         | 30.8 (8.1)                                 | 29.9 (8.6)                                   |
| <sup>a</sup> Education                                     |                    |                                            |                                              |
| Less than a HS degree                                      | 40 (16.3)          | 25 (20.3)                                  | 15 (12.3)                                    |
| HS degree or GED equivalent                                | 112 (45.7)         | 57 (46.3)                                  | 55 (45.1)                                    |
| More than a HS degree <sup>c</sup>                         | 93 (38)            | 41 (33.3)                                  | 52 (42.6)                                    |
| <sup>a</sup> Household income <sup>d</sup> (n=184)         |                    |                                            |                                              |
| \$0-19,999                                                 | 68 (37)            | 30 (31.2)                                  | 38 (43.2)                                    |
| \$20,000-59,999                                            | 72 (39.1)          | 41 (42.7)                                  | 31 (35.2)                                    |
| \$60,000 +                                                 | 44 (23.9)          | 25 (26)                                    | 19 (21.6)                                    |
| <sup>a</sup> Employment status <sup>e</sup> (n=243)        |                    |                                            |                                              |
| Currently working                                          | 108 (44.1)         | 54 (44.6)                                  | 54 (44.3)                                    |
| Not currently working                                      | 135 (55.1)         | 67 (55.4)                                  | 68 (55.7)                                    |
| Kessler Psychological Distress<br>Scale score              | 4.1 (4.5)          | 4.2 (4.7)                                  | 4 (4.3)                                      |
| Center for Epidemiologic<br>Studies Depression Scale score | 15.9 (7.1)         | 15.8 (7.3)                                 | 15.9 (6.9)                                   |
| Monthly (or more) alcohol use<br>in past year              | 66 (26.9)          | 31(25.2)                                   | 35(28.7)                                     |
| Monthly (or more) illegal drug<br>use in the past year     | 18 (7.3)           | 6 (4.9)                                    | 12 (9.8)                                     |
| Cigarettes/day                                             | 19.6 (9.3)         | 19.8 (10.2)                                | 19.5 (8.4)                                   |
| Age started smoking daily<br>(years)                       | 17.1 (4.7)         | 16.8 (4)                                   | 17.4 (5.3)                                   |
| Number of years smoking daily                              | 27.8 (11.8)        | 28.3 (11.3)                                | 27.2 (12.3)                                  |
| Number of lifetime quit<br>attempts                        |                    |                                            |                                              |
| 0                                                          | 79 (32.2)          | 45 (36.6)                                  | 34 (28.6)                                    |
| 1-3                                                        | 116 (47.3)         | 55 (44.7)                                  | 61 (51.2)                                    |
| 4 or more                                                  | 47 (19.2)          | 23 (18.7)                                  | 24 (20.2)                                    |
| Menthol flavor preference                                  | 170 (69.4)         | 85 (69.1)                                  | 85 (69.7)                                    |

|                                                |              |              |              |
|------------------------------------------------|--------------|--------------|--------------|
| Environmental Tobacco Smoke                    |              |              |              |
| Exposure score                                 |              |              |              |
| Little or no ETS                               | 52 (21.2)    | 26 (21.1)    | 26 (21.3)    |
| Moderate ETS                                   | 41 (16.7)    | 20 (16.3)    | 21 (17.2)    |
| High ETS                                       | 152 (62)     | 77 (62.6)    | 75 (61.5)    |
| Fagerström Test for Cigarette                  | 6.1 (2.1)    | 6.2 (2.1)    | 6.1 (2.1)    |
| Dependence score                               |              |              |              |
| Hooked on Nicotine Checklist                   | 7.4 (2.3)    | 7.3 (2.3)    | 7.5 (2.2)    |
| score                                          |              |              |              |
| Penn State Cigarette                           | 13.5 (3.2)   | 13.6 (3.2)   | 13.4 (3.3)   |
| Dependence Index score                         |              |              |              |
| Exhaled carbon monoxide <sup>f</sup>           | 30 (15)      | 30 (15)      | 29 (15)      |
| Plasma Cotinine (ng/mL) <sup>g</sup>           | 274 (151)    | 266 (157)    | 282 (145)    |
| <i>Median (Range)</i>                          | 253 (3-812)  | 237 (3-812)  | 261 (24-730) |
| <b>Baseline 2 Phase (UNC Study Cigarettes)</b> |              |              |              |
| Total cigarettes/day                           | 24.1 (12.5)  | 24 (13.9)    | 24.2 (11)    |
| Study cigarettes/day                           | 24 (12.6)    | 23.8 (14)    | 24.1 (11)    |
| Fagerström Test for Cigarette                  | 6.3 (2.1)    | 6.2 (2.2)    | 6.3 (2)      |
| Dependence score                               |              |              |              |
| Hooked on Nicotine Checklist                   | 6.9 (2.4)    | 6.9 (2.5)    | 7 (2.3)      |
| score                                          |              |              |              |
| Penn State Cigarette                           | 13.4 (3.2)   | 13.5 (3.3)   | 13.3 (3.2)   |
| Dependence Index score                         |              |              |              |
| Exhaled carbon monoxide <sup>f</sup>           | 31 (17)      | 31 (16)      | 32 (17)      |
| Plasma Cotinine (ng/ml) <sup>g</sup>           | 261 (148)    | 260 (149)    | 262 (149)    |
| <i>Median (Range)</i>                          | 237 (11-797) | 238 (11-797) | 234 (26-779) |

Continuous measures reported as mean (standard deviation); Categorical measures reported as frequency (column percent)

BMI= body mass index; ETS= environmental tobacco smoke; HS= high school; GED= general education diploma; SD= standard deviation

<sup>a</sup>Measure incorporated from PhenX Toolkit <sup>37</sup> version October 5, 2015.

<sup>b</sup>Calculated as (V2 Weight (lbs.) x 703) / (V1 Height (in.))<sup>2</sup>

<sup>c</sup>Less than a Bachelor's degree required for inclusion

<sup>d</sup>Total Family (Household) Income includes the participant's income + income of all family members living in the participant's household (before taxes for the last calendar year)

<sup>e</sup>Currently Working includes working full-time or part-time, military; Not Currently Working includes temporarily laid off, sick leave, maternity leave, looking for work, unemployed, retired, non-working disabled (permanently or temporarily), keeping house, non-working student

<sup>f</sup>Reflects the average of two CO measurements if >1 CO was collected at the visit for safety monitoring

<sup>g</sup>Values < Limit of Quantification (LOQ = 4.3) were coded as 3 (LOQ/sqrt(2))

**Table S2.** Results of analyses comparing mCEQ subscales in RNC vs. UNC groups.

| No. of Visit                                           | Visit 4                  |          | Visit 5                  |          | Visit 6                  |               | Visit 7                  |               | Visit 8                  |               | Visit 9                  |               |
|--------------------------------------------------------|--------------------------|----------|--------------------------|----------|--------------------------|---------------|--------------------------|---------------|--------------------------|---------------|--------------------------|---------------|
| Nicotine Content                                       | 7.4 mg                   |          | 3.3 mg                   |          | 1.4 mg                   |               | 0.7 mg                   |               | 0.2 mg                   |               | 0.2 mg                   |               |
|                                                        | Mean difference (95% CI) | <i>p</i> | Mean difference (95% CI) | <i>p</i> | Mean difference (95% CI) | <i>p</i>      | Mean difference (95% CI) | <i>p</i>      | Mean difference (95% CI) | <i>p</i>      | Mean difference (95% CI) | <i>p</i>      |
| Satisfaction <sup>1</sup>                              | 0.11<br>(-0.23,0.46)     | 0.5214   | 0.09<br>(-0.7,0.44)      | 0.6304   | -0.44<br>(-0.8, -0.08)   | <b>0.0172</b> | -0.4<br>(-0.78, -0.03)   | <b>0.0356</b> | -0.47<br>(-0.86, -0.08)  | <b>0.0181</b> | -0.62<br>(-1.02, -0.22)  | <b>0.0026</b> |
| Psychological reward <sup>2</sup>                      | 0.07<br>(-0.21,0.36)     | 0.6113   | 0.06<br>(-0.23,0.35)     | 0.6874   | -0.26<br>(-0.56,0.03)    | 0.0809        | -0.02<br>(-0.33,0.28)    | 0.8768        | -0.24<br>(-0.56,0.07)    | 0.1326        | -0.39<br>(-0.72, -0.06)  | <b>0.0192</b> |
| Aversion <sup>3</sup>                                  | 0.03<br>(-0.17,0.23)     | 0.7556   | 0.03<br>(-0.18,0.23)     | 0.7991   | 0.02<br>(-0.19,0.23)     | 0.8210        | 0.1<br>(-0.12,0.32)      | 0.3690        | -0.05<br>(-0.27,0.18)    | 0.6835        | 0.01<br>(-0.22,0.25)     | 0.9083        |
| Enjoyment of Respiratory Tract Sensations <sup>4</sup> | 0.07<br>(-0.33,0.47)     | 0.7142   | 0.14<br>(-0.27,0.55)     | 0.4995   | -0.21<br>(-0.63,0.2)     | 0.3161        | -0.44<br>(-0.87, -0.003) | <b>0.0486</b> | 0.04<br>(-0.41,0.49)     | 0.8528        | -0.15<br>(-0.61,0.31)    | 0.5261        |
| Craving reduction <sup>5</sup>                         | -0.2<br>(-0.69,0.29)     | 0.4241   | -0.16<br>(-0.66,0.35)    | 0.5367   | -0.71<br>(-1.23, -0.19)  | <b>0.0072</b> | -0.23<br>(-0.77,0.31)    | 0.4021        | -0.59<br>(-1.14, -0.03)  | <b>0.0388</b> | -0.19<br>(-0.76,0.39)    | 0.5260        |

Note: Mean difference of RNC vs. UNC (95% CI). Bolded *p* values indicate significance. Linear mixed-effect models adjusted for baseline (Visit 3) measure of the outcome, flavor, site, age group, education group, brand, gender, race, FTND score, cotinine, employment status. 1: mCEQ subscale 1; 2: mCEQ subscale 2; 3: mCEQ subscale 3; 4: mCEQ subscale 4; 5: mCEQ subscale 5. Unit for Nicotine Content: mg/cigarette.

**Table S3.** Results of analyses comparing CLS in RNC vs. UNC groups.

|        | Visit 4                     |               | Visit 5                     |               | Visit 6                        |                   | Visit 7                        |               | Visit 8                        |                   | Visit 9                        |                   |
|--------|-----------------------------|---------------|-----------------------------|---------------|--------------------------------|-------------------|--------------------------------|---------------|--------------------------------|-------------------|--------------------------------|-------------------|
|        | Mean difference<br>(95% CI) | <i>p</i>      | Mean difference<br>(95% CI) | <i>p</i>      | Mean<br>difference<br>(95% CI) | <i>p</i>          | Mean<br>difference (95%<br>CI) | <i>p</i>      | Mean<br>difference<br>(95% CI) | <i>p</i>          | Mean<br>difference<br>(95% CI) | <i>p</i>          |
| CLS 1  | -0.61<br>(-1.18, -0.03)     | <b>0.0386</b> | -0.76<br>(-1.35, -0.17)     | <b>0.0114</b> | -1.35<br>(-1.95, -0.75)        | <b>&lt;0.0001</b> | -0.88<br>(-1.51, -0.26)        | <b>0.0055</b> | -1.19<br>(-1.84, -0.55)        | <b>0.0003</b>     | -1.29<br>(-1.95, -0.62)        | <b>0.0002</b>     |
| CLS 2  | -0.21<br>(-0.79, 0.36)      | 0.4658        | -0.68<br>(-1.26, -0.09)     | <b>0.0235</b> | -0.51<br>(-1.11, 0.09)         | 0.0935            | -0.26<br>(-0.88, 0.36)         | 0.4080        | -0.56<br>(-1.2, 0.08)          | 0.0863            | -0.66<br>(-1.32, 0.004)        | 0.0516            |
| CLS 3  | -0.03<br>(-0.52, 0.45)      | 0.9012        | -0.34<br>(-0.83, 0.16)      | 0.1868        | -0.16<br>(-0.67, 0.35)         | 0.5481            | -0.17<br>(-0.7, 0.36)          | 0.5340        | -0.27<br>(-0.82, 0.28)         | 0.3355            | -0.35<br>(-0.92, 0.22)         | 0.2267            |
| CLS 4  | -0.2<br>(-0.82, 0.41)       | 0.5187        | -0.68<br>(-1.31, -0.05)     | <b>0.0343</b> | -0.58<br>(-1.23, 0.06)         | 0.0777            | 0.14<br>(-0.53, 0.81)          | 0.6848        | -0.74<br>(-1.43, -0.04)        | <b>0.0371</b>     | -0.92<br>(-1.63, -0.2)         | <b>0.0119</b>     |
| CLS 5  | -0.53<br>(-1.09, 0.02)      | 0.0593        | -0.72<br>(-1.29, -0.16)     | <b>0.0125</b> | -1.39<br>(-1.97, -0.81)        | <b>&lt;0.0001</b> | -1.07<br>(-1.67, -0.47)        | <b>0.0005</b> | -0.99<br>(-1.62, -0.37)        | <b>0.0018</b>     | -1.66<br>(-2.3, -1.01)         | <b>&lt;0.0001</b> |
| CLS 6  | -0.24<br>(-0.82, 0.35)      | 0.4326        | -0.67<br>(-1.27, -0.07)     | <b>0.0290</b> | -1.3<br>(-1.92, -0.68)         | <b>&lt;0.0001</b> | -0.42<br>(-1.06, 0.22)         | 0.1938        | -0.84<br>(-1.5, -0.17)         | <b>0.0135</b>     | -1.42<br>(-2.11, -0.74)        | <b>&lt;0.0001</b> |
| CLS 7  | -0.13<br>(-0.64, 0.38)      | 0.6193        | -0.19<br>(-0.71, 0.33)      | 0.4824        | -0.78<br>(-1.31, -0.25)        | <b>0.0042</b>     | -0.38<br>(-0.93, 0.17)         | 0.1763        | -0.96<br>(-1.54, -0.39)        | <b>0.0010</b>     | -0.81<br>(-1.4, -0.22)         | <b>0.0069</b>     |
| CLS 8  | -0.23<br>(-0.9, 0.45)       | 0.5096        | -0.45<br>(-1.14, 0.23)      | 0.1962        | -0.95<br>(-1.65, -0.25)        | <b>0.0082</b>     | -1.03<br>(-1.76, -0.31)        | <b>0.0054</b> | -1.21<br>(-1.97, -0.46)        | <b>0.0016</b>     | -1.48<br>(-2.25, -0.7)         | <b>0.0002</b>     |
| CLS 9  | -0.19<br>(-0.44, 0.06)      | 0.1305        | -0.25<br>(-0.51, 0.005)     | 0.0545        | -0.55<br>(-0.81, -0.28)        | <b>&lt;0.0001</b> | -0.37<br>(-0.64, -0.1)         | <b>0.0080</b> | -0.7<br>(-0.98, -0.42)         | <b>&lt;0.0001</b> | -0.71<br>(-1, -0.42)           | <b>&lt;0.0001</b> |
| CLS 10 | -0.03<br>(-0.28, 0.22)      | 0.8300        | -0.12<br>(-0.38, 0.14)      | 0.3574        | -0.33<br>(-0.6, -0.07)         | <b>0.0130</b>     | -0.26<br>(-0.53, 0.01)         | 0.0621        | -0.42<br>(-0.71, -0.14)        | <b>0.0033</b>     | -0.42<br>(-0.71, -0.12)        | <b>0.0054</b>     |

Note: Mean difference of RNC vs. UNC (95% CI). Bolded *p* values indicate significance. Linear mixed-effects models adjusted for baseline (visit 3) measure of the outcome, flavor, site, age group, education group, brand, sex, race, FTCD score, cotinine, and employment status. CLS items: CLS item 1: How strong was the cigarette? (1 = not at all, 10 = extremely); CLS item 2: How hot was the cigarette? (1 = not at all, 10 = extremely); CLS item 3: How hard was it to draw? (1 = not at all, 10 = extremely); CLS item 4: How harsh was the cigarette? (1 = not at all, 10 = extremely); CLS item 5: How much taste did you get from the cigarette? (1 = not at all, 10 = extremely); CLS item 6: How satisfying was the cigarette? (1 = not at all, 10 = extremely); CLS item 7: How much tobacco vs. 'just air' did you get from the cigarette? (1 = just air, 10 = just tobacco); CLS item 8: What is the likelihood that you would buy cigarettes like these? (1 = not at all, 10 = extremely); CLS item 9: How much nicotine do you think these cigarettes gave you compared to your usual cigarettes? (1 = much less, 5 = much more); CLS item 10: How satisfying was the hit these cigarettes gave you compared to your usual cigarettes? (1 = much less, 5 = much more).
